# Supplementary material
Source: PubMed Central journal article supplement (PMC4083614)

**Functional characterization of human CTC1 mutations reveals novel mechanisms responsible for the pathogenesis of the telomere disease Coats plus**

Peili Gu<sup>1</sup> and Sandy Chang<sup>1,2,\*</sup>

<sup>1</sup>Department of Laboratory Medicine and <sup>2</sup>Pathology  
Yale University School of Medicine  
330 Cedar St.  
New Haven, CT 06520

**Supplementary Figure 1. RT-PCR analysis of Flag-tagged WT and mutant CTC1 expression (top) and endogenous STN1 expression (bottom) in reconstituted *CTCI*<sup>-/-</sup> MEFs.** The forward primer used for Flag-CTC1 corresponds to the Flag sequence and the reverse primer corresponds to the mouse CTC1 cDNA. Error bar was derived from two independent cell lines.

**Supplementary Figure 2. Stabilization of CTC1, STN1 and TEN1 requires CST complex formation.** A. Flag-CTC1 and Flag-STN1 mutually stabilize each other. B. STN1 and TEN1 mutually stabilize each other. In (A), fixed amount of Flag-CTC1 (1.5ug) was added in 293T cells along with increasing concentrations of Flag-STN1 (0, 0.02, 0.1, 0.5ug) (left). We also fixed Flag-STN1 concentration at 0.5ug with increasing concentrations of Flag-CTC1 added (0, 0.06, 0.3, 1.5ug)(right). For (B), the Flag-STN1 concentration was fixed at 0.2ug, and increasing concentrations of Flag-TEN1 added (0, 0.025, 0.05, 0.1, 0.2ug)(left). The reciprocal experiment was also performed (right). The expressed proteins were detected with anti-Flag antibody.

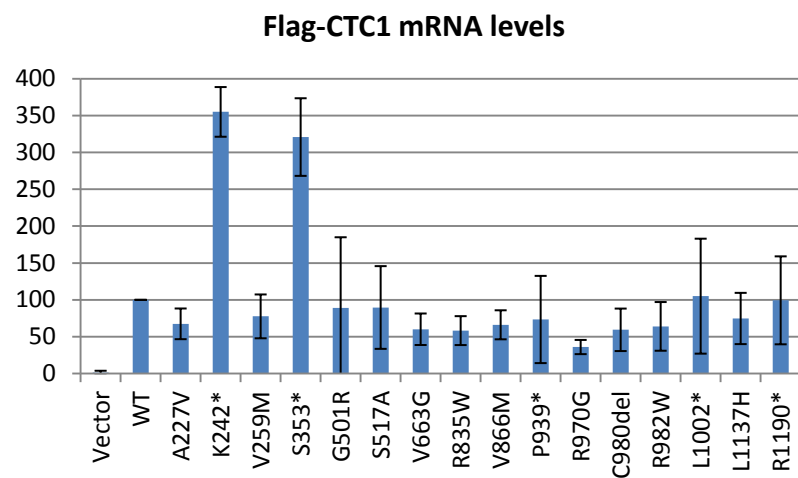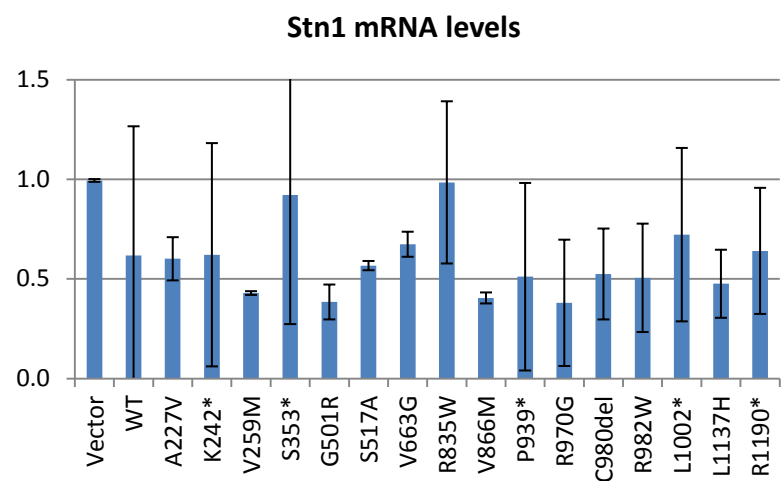

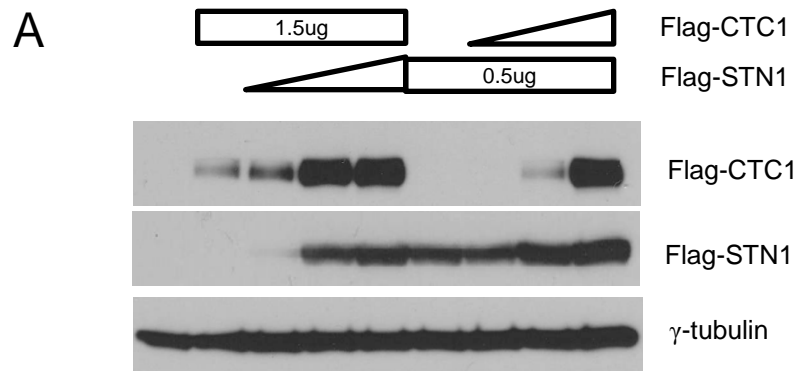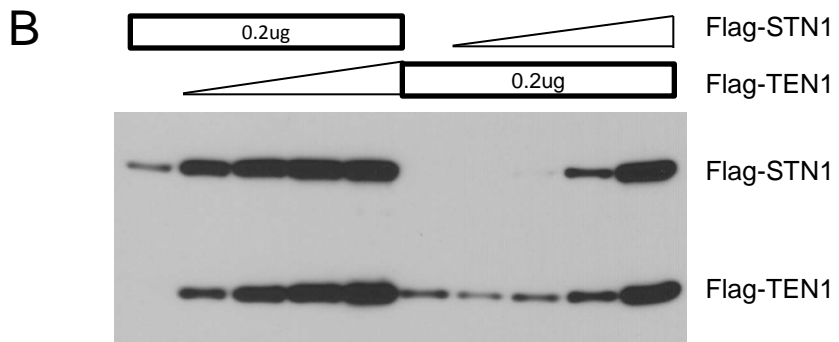

Supplement: NIHMS583345-supplement-Gu_CTC1_mutations_supp_data.pdf [file NIHMS583345-supplement-Gu_CTC1_mutations_supp_data.pdf]
